# Supplementary material for: Clinical diagnostic algorithm in defining tuberculous unilateral pleural effusion in high tuberculosis burden areas short of diagnostic tools
Source: PubMed Central journal article supplement — J Thorac Dis. 2022 Apr;14(4):866–76. doi: 10.21037/jtd-21-1532 (PMC9096308; doi:10.21037/jtd-21-1532), 2022-04
Supplement: jtd-14-04-866-dss.pdf [file jtd-14-04-866-dss.pdf]

## Data Sharing Statement

|                     |                                                                                                                                                    |                                                                                                                  |
|---------------------|----------------------------------------------------------------------------------------------------------------------------------------------------|------------------------------------------------------------------------------------------------------------------|
| <b>Article Info</b> | <a href="https://dx.doi.org/10.21037/jtd-21-1532">https://dx.doi.org/10.21037/jtd-21-1532</a>                                                      |                                                                                                                  |
| <b>Item</b>         | <b>Question</b>                                                                                                                                    | <b>Authors' Response<br/>(place "-" if not applicable)</b>                                                       |
| 1                   | Would you like to share data collected for your study to others?                                                                                   | Yes                                                                                                              |
| 2                   | If not, would you like to share the reason for your decision?                                                                                      | -                                                                                                                |
| 3                   | What data in particular will be shared?                                                                                                            | ADA, final diagnosis, light criteria, IGRA.                                                                      |
| 4                   | Any other documents will be share? Such as study protocol, statistical analysis plan, informed consent form, clinical study report, analytic code. | No                                                                                                               |
| 5                   | When will data availability begin?                                                                                                                 | From the publication date.                                                                                       |
| 6                   | When will data availability end?                                                                                                                   | One years within the publication date,                                                                           |
| 7                   | To whom will you share the data?                                                                                                                   | Doctors of pulmonary department or thoracic department.                                                          |
| 8                   | For what type of analysis or purpose?                                                                                                              | For analysis to evaluate the efficacy                                                                            |
| 9                   | How or where can the data/ documents be obtained?                                                                                                  | From corresponding author by email                                                                               |
| 10                  | Any other restrictions?                                                                                                                            | We may balance the potential benefits and risks for each request and then provide the data that could be shared. |
