# Supplementary material for: Clinical diagnostic algorithm in defining tuberculous unilateral pleural effusion in high tuberculosis burden areas short of diagnostic tools
Source: PubMed Central journal article supplement — J Thorac Dis. 2022 Apr;14(4):866–76. doi: 10.21037/jtd-21-1532 (PMC9096308; doi:10.21037/jtd-21-1532), 2022-04
Supplement: jtd-14-04-866-supplementary.pdf [file jtd-14-04-866-supplementary.pdf]

**Table S1** Clinical characteristics and final diagnosis of 10 patients of treatment failure in TPE group

| Characteristic          | P1              | P2              | P3              | P4                | P5           | P6        | P7                  | P8           | P9        | P10             |
|-------------------------|-----------------|-----------------|-----------------|-------------------|--------------|-----------|---------------------|--------------|-----------|-----------------|
| Gender                  | M               | M               | F               | M                 | F            | M         | F                   | M            | M         | M               |
| Age                     | 41              | 20              | 21              | 47                | 47           | 45        | 50                  | 66           | 20        | 39              |
| BMI                     | 21.6            | 19.1            | 19.2            | 23.9              | 24.5         | 24.8      | 29.8                | 25.6         | 17.3      | 27.7            |
| Smoking index           | 0               | 25              | 0               | 600               | 0            | 400       | 0                   | 160          | 80        | 0               |
| Main complaints         | Cough, fever    |                 |                 | Fever, chest pain |              |           |                     | Cough, fever |           |                 |
| Location                | R               | R               | R               | R                 | R            | R         | R                   | L            | R         | R               |
| Diameter, cm            | 10              | 17.2            | 3.6             | 12.1              | 11           | 8.6       |                     | 7.3          |           | 10.9            |
| Effusion separation     | No              | No              | No              | Yes               | Yes          | No        | Yes                 | No           | Yes       | Yes             |
| TB-Ab                   | Neg             |                 |                 | Pos               | Neg          |           | Pos                 | Pos          |           |                 |
| IGRA                    |                 |                 |                 | Pos               | Neg          |           | Neg                 | Neg          | Pos       | Pos             |
| PPD                     | Pos             | Pos             | Pos             |                   | Pos          | Pos       |                     |              | Neg       |                 |
| Property                | Exudate         | Exudate         | Exudate         | Exudate           | Exudate      | Exudate   | Exudate             | Exudate      | Exudate   | Exudate         |
| ADA, U/mL               | 41.21           | 433.2           | 40.89           | 38.47             | 41.36        | 47.56     | 43.82               | 58.62        | 42.77     | 62.98           |
| CEA (ng/mL)             | 1.34            | 1.55            | 1.25            | 0.47              | 1.07         | 3.72      | 1.1                 |              | 0.76      | 1.5             |
| NSE (ng/mL)             | 1.17            |                 |                 | 2                 | 10.14        | 3.52      |                     |              |           |                 |
| CA199 (U/mL)            | 3.7             | <0.8            | 3.6             | 2.1               | 5.4          | 9.2       | 6.6                 |              |           | 16.3            |
| CA125 (U/mL)            | 17.9            | 158.7           | 206.8           | 92.1              | 202.7        | 157.1     | 106.2               |              | 61.1      | 67.2            |
| CA153 (U/mL)            |                 |                 |                 | 5.5               |              | 7.3       |                     |              |           |                 |
| TK1 (pmol/L)            | 2.57            | 1.8             | 3.53            | 2.79              | 1.93         | 3.58      |                     |              | 6.21      | 2.18            |
| WBC ( $\times 10^9/L$ ) | 6.22            | 7.3             | 4.32            | 5.9               | 11.5         | 11.42     | 6.27                | 10.51        | 10.14     | 5.25            |
| N%                      | 75.6            | 79.9            | 69.1            | 75.1              | 73.6         | 74.7      | 70.2                | 84.6         | 95.6      | 59              |
| PCT (ng/mL)             | 0.11            | <0.05           | <0.05           | 0.12              | <0.05        | 0.06      | <0.05               | 0.10         | <0.05     | <0.05           |
| ESR (mm/h)              | 17              | 4               | 53              | 73                | 89           | 34        | 15                  |              | 44        | 88              |
| CRP (mg/L)              | 50.43           | 6.08            | 22.3            | 70.41             | 83.1         | 176.98    | 2.24                |              | 48.16     | 82.05           |
| Drug                    | HRES            | HRES            | HREZ            | HREZ              | HREZ         | HRES      | HREZ                | HREZ         | HREZ      | HRES            |
| Treatment time, month   | 3.6             | 2.3             | 1.1             | 2.9               | 3.3          |           | 7.4                 |              | 3.3       |                 |
| Final diagnosis         | Drug resistance | Drug resistance | Drug resistance | Drug resistance   | Angiosarcoma | Pneumonia | Uterine adenomyosis | Lymphoma     | Pneumonia | Drug resistance |

TPE, tuberculous pleural effusions; TB-Ab, tuberculosis antibody; IGRA, interferon gamma release assay; PPD, purified protein derivative; ADA, adenosine deaminase; CEA, carcinoembryonic antigen; NSE, neuron-specific enolase; CA, carbohydrate antigen; TK1, thymidine kinase 1; WBC, white blood cell; PCT, procalcitonin; ESR, erythrocyte sedimentation rate; CRP, C-reactive protein.
